# Supplementary material
Source: publisher figshare collection journal article supplement (https://karger.figshare.com/ndownloader/files/28959570)

**Supplementary Figure 10.** Funnel plot showing the association between sarcopenia and mortality for articles that reported (a) hazard ratios and (b) odds ratios

(a)


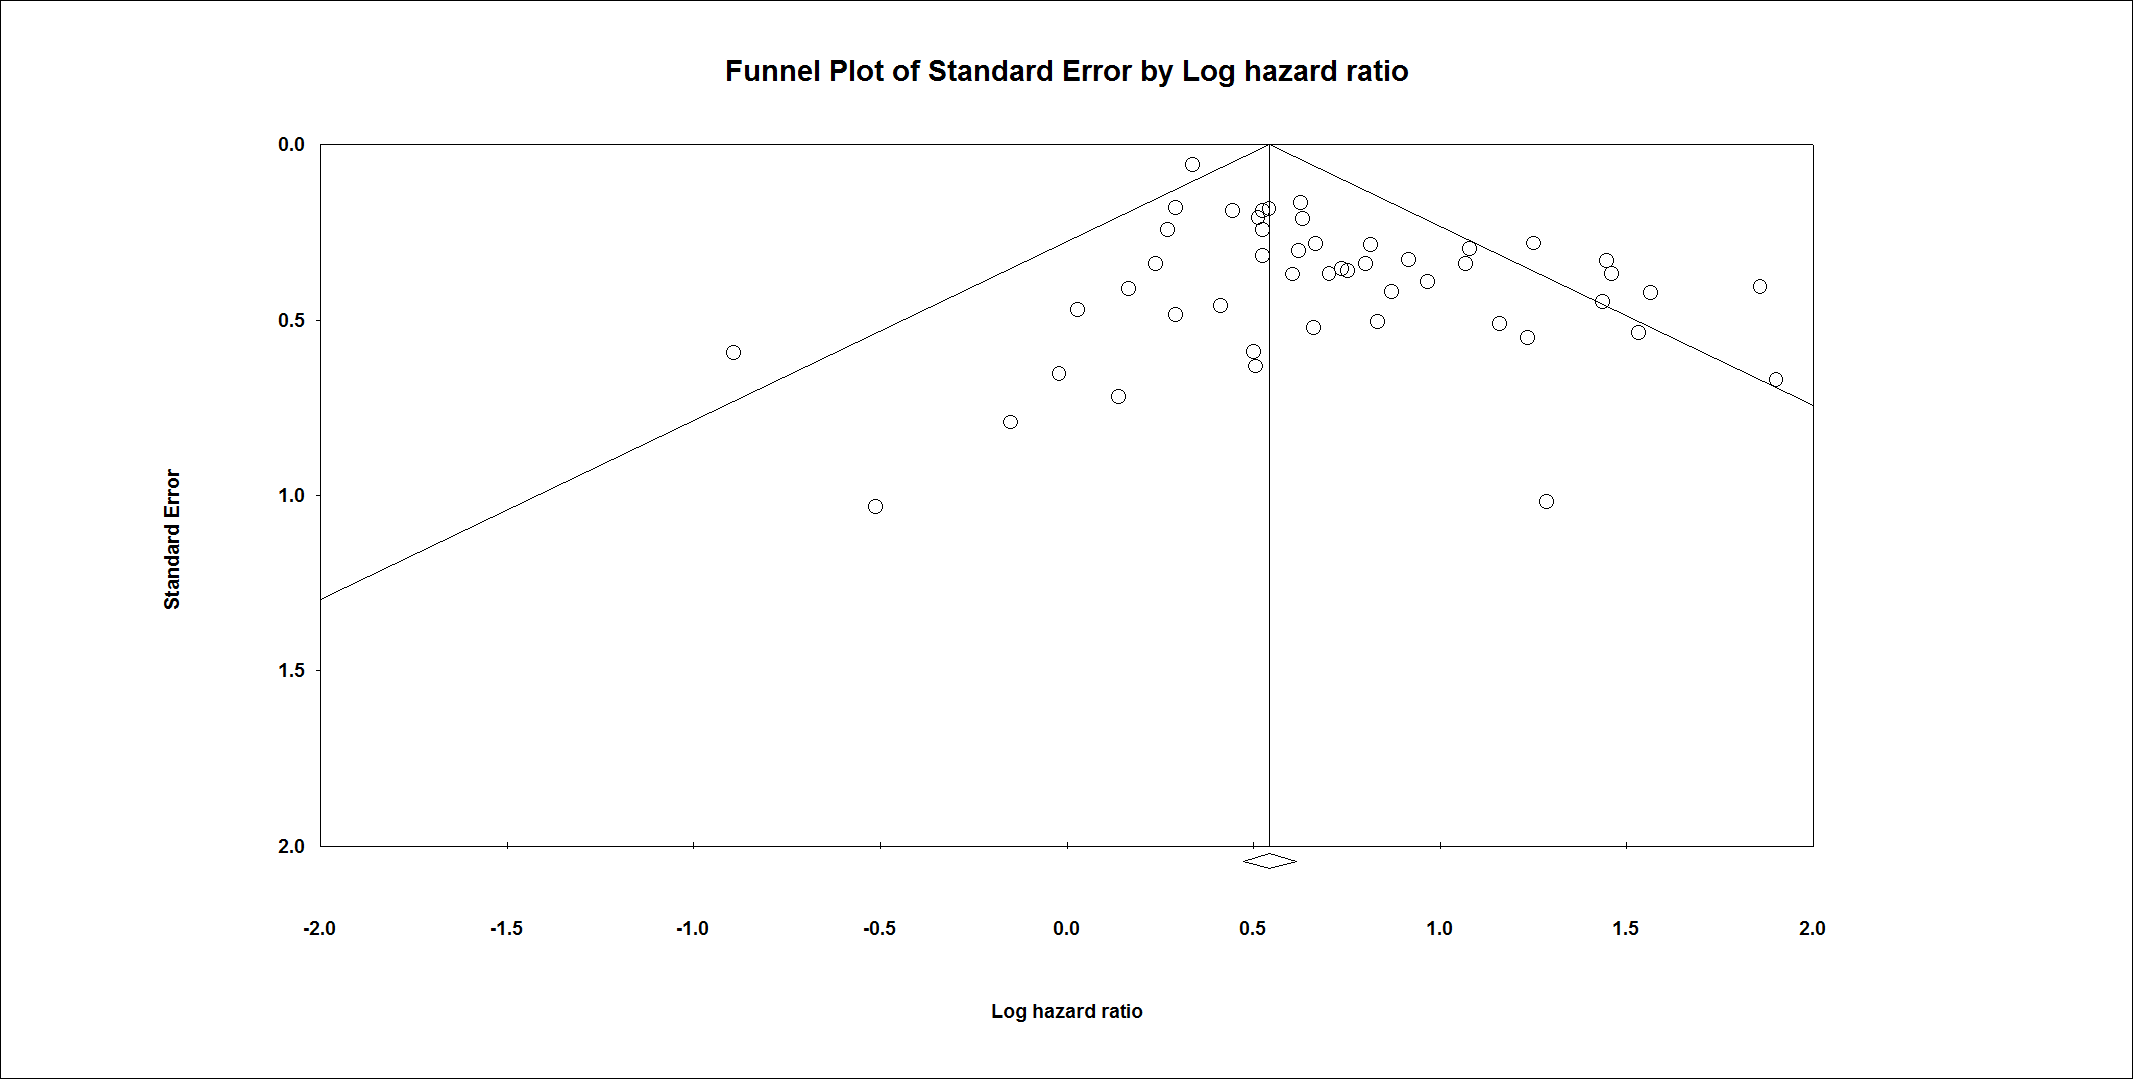


(b)


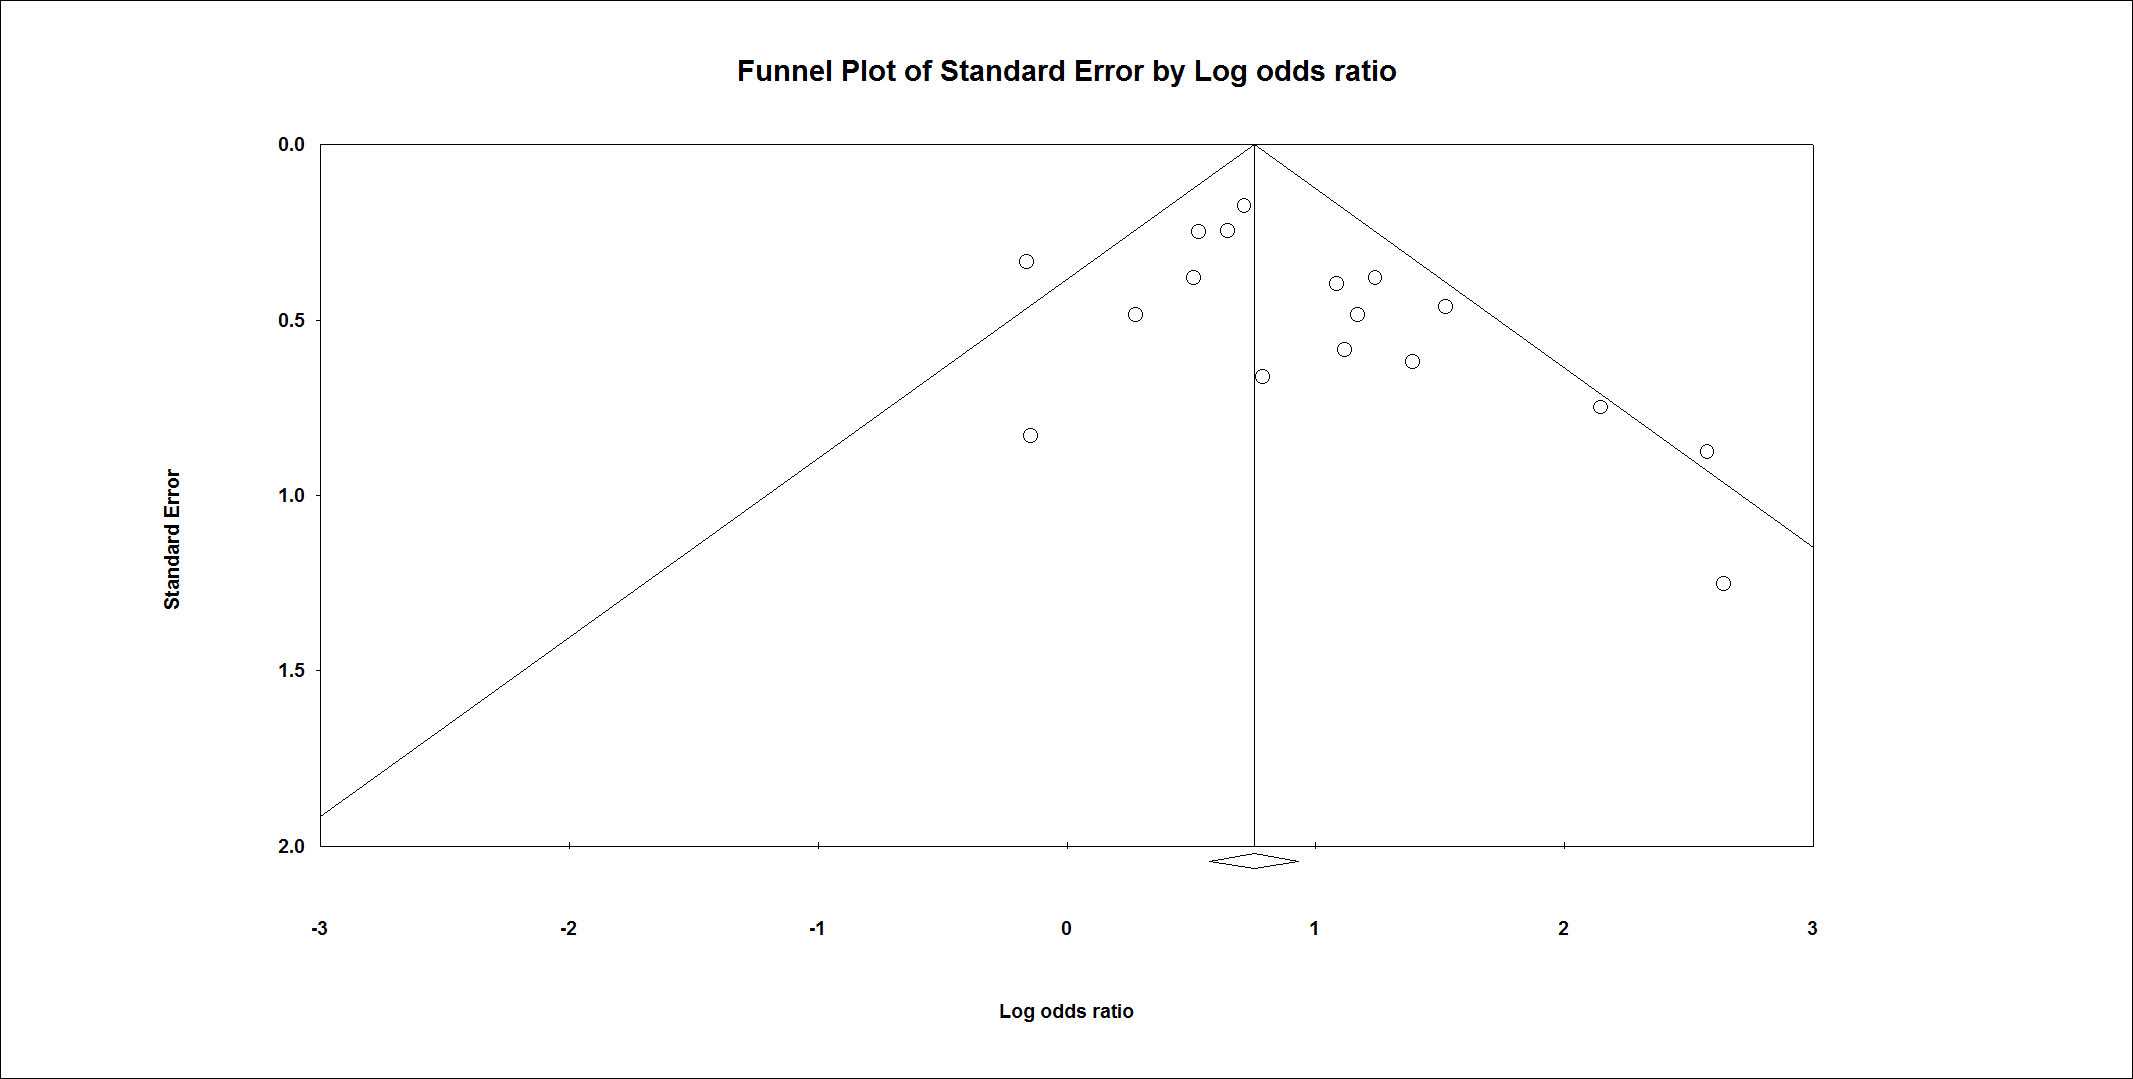

Supplement: Supplementary file 1 [file 28959570]
